# Supplementary material
Source: Research Square preprint supplement (doi:10.21203/rs.3.rs-10046029/v1)
Supplement: Supplementary file 1 [file 2b16d2a4f26ea2c76dc5fc00.docx]

**Supplementary Table 3.** Odds Ratios (ORs) and 95% Confidence Intervals (CIs) for Sociodemographic, Behavioural, and Metabolic Correlates of Hypertension Across Regions in Indian Females

| **Females** | **Odds Ratio (95% CI)** | | | | | |
| --- | --- | --- | --- | --- | --- | --- |
| **Variables** | **Northern Region** | **Eastern Region** | **Western Region** | **Central Region** | **Southern Region** | **Northeast Region** |
| Age  15 – 24 Years  25 – 34 Years  35 – 44 Years  45 – 49 Years | Ref  2.18 (2.10-2.25)***  3.93 (3.78-4.08)***  5.99 (5.79-6.20)*** | Ref  2.22 (2.12-2.33)***  3.82 (3.64-4.03)***  6.06 (5.79-6.35)*** | Ref  2.02 (1.92-2.37)***  3.55 (3.35-3.75)***  5.68 (5.42-5.96)*** | Ref  2.11 (1.99-2.23)***  3.65 (3.43-3.89)***  5.91(5.60-6.24)*** | Ref  2.22 (2.10-2.34)***  3.96 (3.75-4.19)***  7.30 (6.95-7.68)*** | Ref  2.24 (2.13-2.35)***  3.69 (3.49-3.89)***  5.68 (5.42-5.96)*** |
| Residence  Rural  Urban | Ref  1.23 (1.20-1.26)*** | Ref  1.23 (1.18-1.28)*** | Ref  1.14 (1.10-1.18)*** | Ref  1.08 (1.04-1.13)*** | Ref  1.18 (1.09-1.26)*** | Ref  1.35 (1.24-1.47)*** |
| Marital Status  Never in Union  Married  DSW | Ref  3.37 (3.27-3.48)***  4.90 (4.60-5.22)*** | Ref  3.00 (2.86-3.15)***  4.78 (4.41-5.17)*** | Ref  3.05 (2.90-3.24)***  4.52 (4.18-4.90)*** | Ref  3.07 (2.91-3.24)***  4.34 (3.96-4.76)*** | Ref  3.57 (3.39-3.76)***  5.12 (4.78-5.48)*** | Ref  2.73 (2.62-2.84)***  3.24 (3.02-3.49)*** |
| Level of Education  No education  Primary  Secondary  Higher | 1.88 (1.82-1.95)***  1.72 (1.65-1.80)***  1.15 (1.11-1.19)***  Ref | 1.54 (1.44-1.64)***  1.44 (1.34-1.54)***  0.96 (0.90-1.02)  Ref | 1.92 (1.81-2.03)***  1.70 (1.60-1.81)***  1.12 (1.06-1.18)***  Ref | 2.14 (1.99-2.30)***  1.80 (1.66-1.95)***  1.0 (0.93-1.07)  Ref | 2.20 (2.09-2.31)  2.21(2.09-2.34)  1.36 (1.30-1.43)  Ref | 1.85 (1.74-1.97)  1.46 (1.37-1.56)  1.04 (0.98-1.10)  Ref |
| Currently Working  No  Yes | Ref  1.15 (1.07-1.23)*** | Ref  1.23 (1.12-1.35)*** | Ref  1.28 (1.17-1.39)*** | Ref  1.21 (1.10-1.34)*** | Ref  1.13 (1.05-1.22)** | Ref  1.25 (1.15-1.36)*** |
| Wealth Index  Lower  Middle  High | Ref  1.07 (1.04-1.10)***  1.23 (1.20-1.26)*** | Ref  1.05 (1.01-1.10)*  1.23 (1.18-1.27)*** | Ref  1.08 (1.04-1.13)***  1.17 (1.13-1.22)*** | Ref  0.97 (0.92-1.02)  1.09 (1.04-1.13)*** | Ref  1.12 (1.07-1.16)***  1.24 (1.20-1.29)*** | Ref  1.03 (0.99-1.08)  1.12 (1.08-1.16)*** |
| Dietary Pattern  Vegetarian  Non-vegetarian | Ref  1.11 (1.08-1.13)*** | Ref  1.15 (1.11-1.20)*** | Ref  0.92 (0.89-0.95)*** | Ref  0.95 (0.91-0.98)*** | Ref  0.94 (0.90-0.98)*** | Ref  1.35 (1.26-1.45)*** |
| Tobacco Use  No  Yes | Ref  1.28 (1.18-1.38)*** | Ref  1.85 (1.75-1.97)*** | Ref  1.26 (1.18-1.35)*** | Ref  1.46 (1.38-1.55)*** | Ref  1.42 (1.31-1.55)*** | Ref  1.16 (1.12-1.20)*** |
| Alcohol Consumption  No  Yes | Ref  1.45 (1.16-1.81)*** | Ref  1.98 (1.78-2.20)*** | Ref  1.51 (1.12-2.03)*** | Ref  1.83 (1.65-2.02)*** | Ref  1.58 (1.42-1.75)*** | Ref  1.70 (1.61-1.80)*** |
| Waist Circumference  *F* < 80 cm, M < 90 cm  *F >* 80 cm, M > 90 cm | Ref  2.89 (2.82-2.96)*** | Ref  2.63 (2.55-2.72)*** | Ref  2.52 (2.44-2.60)*** | Ref  2.42 (2.32-2.51)*** | Ref  2.64 (2.55-2.72)*** | Ref  2.33 (2.26-2.40)*** |
| Waist-to-hip ratio  F < 0·80, M < 0·90  F > 0·80, M > 0·90 | Ref  2.00 (1.93-2.07)*** | Ref  1.82 (1.73-1.91)*** | Ref  1.50 (1.44-1.55)*** | Ref  1.46 (1.40-1.53)*** | Ref  1.80 (1.73-1.87)*** | Ref  1.54 (1.47-1.62)*** |
| High Blood Glucose  No  Yes | Ref  2.29 (2.21-2.38)*** | Ref  2.09 (2.00-2.18)*** | Ref  2.24 (2.13-2.36)*** | Ref  1.98 (1.86-2.11)*** | Ref  2.61 (2.50-2.72)*** | Ref  2.12 (2.03-2.22)*** |

**Notes:** Odds ratios (ORs) are presented with 95% confidence intervals (CI). Reference categories are denoted by “Ref”. DSW = divorced, separated, or widowed. Given the cross-sectional design of NFHS-5, the reported associations represent correlates of hypertension and should not be interpreted as causal effects. Statistical significance levels are indicated as p < 0.05 (*), p < 0.01 (**), and p < 0.001 (***). Analyses accounted for the complex survey design and sampling weights of NFHS-5.
