# Supplementary material
Source: Research Square preprint supplement (doi:10.21203/rs.3.rs-10046029/v1)
Supplement: Supplementary file 2 [file 42e4bb626a32bf49c0456038.docx]

**Supplementary Table 1.** Sociodemographic, Behavioural, and Metabolic Characteristics of the Study Population Stratified by Sex, India, NFHS-5 (2019-2021)

| **Variables** | | **Sex** | | | | |
| --- | --- | --- | --- | --- | --- | --- |
| **Females** | | **Males** | |
| N | % | N | % |
| Age | 15-24 Years | 211512 | 32.0 | 31385 | 32.7 |
| 24-34 Years | 194915 | 29.5 | 27982 | 29.1 |
| 35-44 Years | 93377 | 14.1 | 14044 | 14.6 |
| 45-49 Years (females)/45-54 Years (males) | 160223 | 24.3 | 22592 | 23.5 |
| Residence | Urban | 162539 | 24.6 | 24360 | 25.4 |
| Rural | 497488 | 75.4 | 71643 | 74.6 |
| Marital Status | Never Married | 172147 | 26.1 | 34400 | 35.8 |
| Married | 458530 | 69.5 | 60107 | 62.6 |
| DSW | 29350 | 4.4 | 1496 | 1.6 |
| Level of Education | No education | 155542 | 23.6 | 11615 | 12.1 |
| Primary | 78308 | 11.9 | 11151 | 11.6 |
| Secondary | 335814 | 50.9 | 56568 | 58.9 |
| Higher | 90363 | 13.7 | 16669 | 17.4 |
| Currently Working | No | 72551 | 73.0 | 24344 | 25.4 |
| Yes | 26766 | 27.0 | 71659 | 74.6 |
| Wealth Index | Lower | 280666 | 42.5 | 40752 | 42.4 |
| Middle | 138679 | 21.0 | 20274 | 21.1 |
| High | 240682 | 36.5 | 34977 | 36.4 |
| Dietary Pattern | Non-Vegetarian | 246095 | 37.3 | 27374 | 28.5 |
| Vegetarian | 413932 | 62.7 | 68629 | 71.5 |
| Tobacco Use | Yes | 43181 | 6.5 | 42127 | 43.9 |
| No | 616846 | 93.5 | 53876 | 56.1 |
| Alcohol Consumption | No | 647242 | 98.1 | 70804 | 73.8 |
| Yes | 12785 | 1.9 | 25199 | 26.2 |
| Waist Circumference | F < 80 cm, M < 90 cm | 406488 | 61.7 | 77314 | 80.7 |
| F > 80 cm, M > 90 cm | 252332 | 38.3 | 18457 | 19.3 |
| Waist-to-Hip Ratio | F < 0.80, M < 0.90 | 136838 | 20.8 | 49385 | 51.9 |
| F > 0.80, M > 0.90 | 520804 | 79.2 | 45736 | 48.1 |
| High Blood Glucose | No | 601195 | 91.1 | 83426 | 87.8 |
| Yes | 58832 | 8.9 | 11554 | 12.2 |

**Notes:** DSW = divorced, separated, or widowed. Wealth index categories were derived from the NFHS-5 household wealth index and grouped as lower, middle, and higher wealth categories. Waist circumference and waist-to-hip ratio categories were sex-specific according to established cut-off values. NFHS-5 = National Family Health Survey, round 5 (2019–2021).
