# Supplementary material
Source: Research Square preprint supplement (doi:10.21203/rs.3.rs-10046029/v1)
Supplement: Supplementary file 3 [file 455dc427e731f8a875708a5d.docx]

**Supplementary Table 2.** Odds Ratios (ORs) and 95% Confidence Intervals (CIs) for Sociodemographic, Behavioural, and Metabolic Correlates of Hypertension Across Regions in Indian Males

| **Males** | **Odds Ratio (95% CI)** | | | | | |
| --- | --- | --- | --- | --- | --- | --- |
| **Variables** | **Northern Region** | **Eastern Region** | **Western Region** | **Central Region** | **Southern Region** | **Northeast Region** |
| Age  15 – 24 Years  25 – 34 Years  35 – 44 Years  45 – 54 Years | Ref  1.89 (1.76-2.03)***  2.73 (2.50-2.97)***  3.75 (3.47-4.04)*** | Ref  1.91 (1.72-2.13)***  2.79 (2.47-3.15)***  3.57 (3.21-3.96)*** | Ref  1.96 (1.78-2.16)***  2.50 (2.23-2.80)***  3.78 (3.42-4.17)*** | Ref  2.28 (2.02-2.56)***  3.23 (2.81-3.71)***  4.33 (3.84-4.89)*** | Ref  2.13 (1.91-2.37)***  3.71 (3.30-4.17)***  5.04 (4.55-5.59)*** | Ref  2.07 (1.87-2.29)***  3.00 (2.67-3.36)***  4.06 (3.66-4.50)*** |
| Residence  Rural  Urban | Ref  1.34 (1.26-1.42)*** | Ref  1.23 (1.12-1.35)*** | Ref  1.04 (0.97-1.13)*** | Ref  1.17 (1.06-1.30)*** | Ref  1.18 (1.09-1.26)*** | Ref  1.35 (1.24-1.47)*** |
| Marital Status  Never in Union  Married  DSW | Ref  2.84 (2.67-3.02)***  3.12 (2.52-3.88)*** | Ref  2.94 (2.68-3.22)***  4.37 (3.19-5.97)*** | Ref  2.77 (2.55-3.02)***  3.14 (2.44-4.04)*** | Ref  3.07 (2.77-3.40)***  3.69 (2.80-4.86)*** | Ref  3.16 (2.92-3.43)***  4.11 (3.05-5.54)*** | Ref  2.79 (2.57-3.02)***  3.29 (2.54-4.27)*** |
| Level of Education  No education  Primary  Secondary  Higher | Ref  1.12 (0.99-1.26)  1.07 (0.98-1.17)  1.09 (0.98-1.21) | Ref  0.99 (0.86-1.13)  1.05 (0.94-1.16)  1.03 (0.89-1.18) | Ref  0.97 (0.83-1.13)  1.01 (0.90-1.14)  1.01 (0.88-1.16) | Ref  0.97 (0.83-1.13)  1.01 (0.90-1.14)  1.01 (0.88-1.16) | Ref  1.06 (0.91-1.23)  1.16 (1.04-1.30)**  1.23 (1.09-1.40)** | Ref  1.03 (0.90-1.19)  1.17 (1.04-1.30)**  1.24 (1.08-1.42)** |
| Currently Working  No  Yes | Ref  2.05 (1.92-2.18)** | Ref  2.23 (2.03-2.46)*** | Ref  2.22 (2.02-2.45)*** | Ref  1.79 (1.61-1.98)*** | Ref  2.29 (2.09-2.52)*** | Ref  2.02 (1.85-2.21)*** |
| Wealth Index  Lower  Middle  High | Ref  1.12 (1.05-1.21)**  1.30 (1.22-1.38)*** | Ref  1.11 (1.00-1.23)***  1.23 (1.13-1.34)*** | Ref  1.04 (0.95-1.14)***  1.15 (1.06-1.25)*** | Ref  0.99 (0.88-1.11)  1.22 (1.12-1.34)*** | Ref  1.07 (0.98-1.17)  1.22 (1.13-1.32)*** | Ref  1.06 (0.96-1.16)  1.23 (1.14-1.33)*** |
| Dietary Pattern  Vegetarian  Non-vegetarian | Ref  1.12 (1.06-1.18)*** | Ref  1.05 (0.92-1.19) | Ref  0.98 (0.91-1.05) | Ref  0.95 (0.87-1.04) | Ref  1.02 (0.92-1.13) | Ref  1.01 (0.81-1.27) |
| Tobacco Use  No  Yes | Ref  1.22 (1.15-1.28)*** | Ref  1.53 (1.42-1.65)*** | Ref  1.31 (1.20-1.42)*** | Ref  1.33 (1.23-1.44)*** | Ref  1.38 (1.29-1.48)*** | Ref  1.34 (1.25-1.44)*** |
| Alcohol Consumption  No  Yes | Ref  1.94 (1.83-2.07)*** | Ref  1.60 (1.48-1.73)*** | Ref  1.62 (1.47-1.79)*** | Ref  1.59 (1.45-1.74)*** | Ref  1.69 (1.58-1.82)*** | Ref  1.66 (1.55-1.79)*** |
| Waist Circumference  *F* < 80 cm, M < 90 cm  *F >* 80 cm, M > 90 cm | Ref  3.18 (2.99-3.37) | Ref  2.87 (2.61-3.16) *** | Ref  2.93 (2.69-3.19) *** | Ref  2.79 (2.49-3.13) *** | Ref  2.63 (2.45-2.83) *** | Ref  2.88 (2.60-3.20) *** |
| Waist-to-hip ratio  F < 0·80, M < 0·90  F > 0·80, M > 0·90 | Ref  1.82 (1.72-1.92)*** | Ref  1.76 (1.63-1.90)*** | Ref  1.69 (1.58-1.82)*** | Ref  1.79 (1.65-1.95)*** | Ref  2.15 (2.01-2.31)*** | Ref  1.53 (1.42-1.64)*** |
| High Blood Glucose  No  Yes | Ref  2.42 (2.23-2.63)*** | Ref  2.07 (1.88-2.29)*** | Ref  2.41 (2.18-2.68)*** | Ref  1.99 (1.75-2.26)*** | Ref  2.70 (2.46-2.96)*** | Ref  2.04 (1.85-2.25)*** |

**Notes:** Odds ratios (ORs) are presented with 95% confidence intervals (CI). Reference categories are denoted by “Ref”. DSW = divorced, separated, or widowed. Given the cross-sectional design of NFHS-5, the reported associations represent correlates of hypertension and should not be interpreted as causal effects. Statistical significance levels are indicated as p < 0.05 (*), p < 0.01 (**), and p < 0.001 (***). Analyses accounted for the complex survey design and sampling weights of NFHS-5.
