# Supplementary material
Source: Research Square preprint supplement (doi:10.21203/rs.3.rs-10046029/v1)
Supplement: Supplementary file 4 [file a3e87d1d6e92df27210c86c0.docx]

**Supplementary Table 4.** Adjusted Odds Ratios (AORs) and 95% Confidence Intervals (CIs) for Sociodemographic, Behavioural, and Metabolic Correlates of Hypertension in Punjab and Sikkim, Stratified by Sex

|  | **AOR (95% CI)** | | | |
| --- | --- | --- | --- | --- |
| **Sikkim** | | **Punjab** | |
| **Female** | **Male** | **Female** | **Male** |
| Age  15 – 24 Years  25 – 34 Years  35 – 44 Years  45 -49 female /45 – 54 Years male | Ref  2.63 (1.34-5.09)**  4.19 (1.63-7.62)***  5.56 (2.27-10.67)*** | Ref  2.25 (1.16-4.35)*  4.59 (2.11-9.98)***  5.03 (2.31-10.95)*** | Ref  1.83 (1.29-2.61)***  2.94 (1.99-4.36)***  5.48 (3.74-8.04)*** | Ref  1.27 (0.96-1.57)  1.54 (1.13-2.10)**  2.34 (1.74-3.15)** |
| Residence  Rural  Urban | Ref  0.84 (0.44-1.59) | Ref  1.69 (0.85-3.37) | 1.29 (1.07-1.57)*  Ref | 1.24 (1.04-1.48)*  Ref |
| Marital Status  Never in Union  Married  DSW | Ref  0.75 (0.42-1.36)  1.07 (0.38-3.02) | Ref  0.86 (0.48-1.52)  0.27 (0.08-1.03) | Ref  1.41 (0.99-2.01)  1.64 (0.89-2.41) | Ref  1.75 (1.38-2.22)***  1.95 (1.06-3.60)* |
| Level of Education  No education  Primary  Secondary  Higher | 1.35 (0.55-3.31)  1.36 (0.64-2.89)  1.15 (0.64-2.88)  Ref | 1.01 (0.43-1.52)  1.07 (0.53-2.19)  1.12 (0.60-2.08)  Ref | 1.28 (0.91-1.80)  1.21 (0.85-1.71)  1.10 (0.85-1.41)  Ref | Ref  1.04 (0.75-1.43)  1.10 (0.78-1.54)  1.12 (0.89-1.41) |
| Currently Working  No  Yes | Ref  0.93 (0.59-1.48) | Ref  1.90* (1.07-3.35) | Ref  0.99 (0.81-1.21) | Ref  1.28* (1.01-1.63) |
| Wealth Index  Lower  Middle  High | Ref  0.88 (0.52-1.51)  0.84 (0.48-1.50) | Ref  0.90 (0.56-1.59)  1.01 (0.56-1.82) | Ref  0.97 (0.77-1.23)  1.06 (0.85-1.33) | Ref  1.07 (0.86-1.33)  1.21 (0.82-1.47) |
| Dietary Pattern  Vegetarian  Non-vegetarian | Ref  0.65 (0.35-1.20) | Ref  0.66 (0.31-1.39) | Ref  0.78 (0.60-1.30) | Ref  0.97 (0.82-1.15) |
| Alcohol Consumption  No  Yes | Ref  1.07 (0.59-1.94) | Ref  1.69 (1.04-2.77)* | NE | Ref  1.63 (1.34-1.97)*** |
| Tobacco Use  No  Yes | Ref  1.39 (0.61-3.19) | Ref  0.82 (0.51-1.35) | NE | Ref  0.92 (0.73-1.16) |
| Waist-to-hip ratio  F < 0·80, M < 0·90  F > 0·80, M > 0·90 | Ref  1.08 (0.41-2.88) | Ref  2.39 (1.46-3.89)*** | Ref  0.94 (0.68-1.30) | Ref  1.10 (0.91-1.33) |
| Waist Circumference  *F* < 80 cm, M < 90 cm  *F >* 80 cm, M > 90 cm | Ref  1.59* (1.03-2.48) | Ref  1.37 (0.75-2.50) | Ref  1.59 (1.27-1.98)*** | Ref  1.71 (1.42-2.06)*** |
| High Blood Glucose  No  Yes | Ref  1.77 (0.94-3.33) | Ref  1.74 (0.88-3.43) | Ref  1.57 (1.21-2.05)*** | Ref  1.70 (1.31-2.21)** |

**Notes:** Adjusted odds ratios (AORs) are presented with 95% confidence intervals (CI) derived from sex-specific multivariable logistic regression models. Reference categories are denoted by “Ref”. DSW = divorced, separated, or widowed. Statistical significance levels are indicated as p < 0.05 (*), p < 0.01 (**), and p < 0.001 (***). NE =. Not Estimable. Given the cross-sectional design of NFHS-5, the reported associations should be interpreted as correlates rather than causal effects. Analyses accounted for the complex survey design and sampling weights of NFHS-5
